# Supplementary material for: Phenotype-driven gene prioritization for rare diseases using graph convolution on heterogeneous networks
Source: PubMed Central journal article supplement (PMC6035401; doi:10.1186/s12920-018-0372-8), 2018-07-06
Supplement: 12920_2018_372_MOESM1_ESM.pdf [file 12920_2018_372_MOESM1_ESM.pdf]

## Test Cases

| Internal ID               | Clinical Indication and Phenotype (HPO)                                            | Diagnosed Disorder                                                             | Orphanet ID (Diagnosed Disorder)                                                                                                                     | Gene    | HGNC Gene ID | (NM) or Locus and Genomic Variant (zygosity)      | Inheritance Pattern |
|---------------------------|------------------------------------------------------------------------------------|--------------------------------------------------------------------------------|------------------------------------------------------------------------------------------------------------------------------------------------------|---------|--------------|---------------------------------------------------|---------------------|
| <b>Stavropoulos et al</b> |                                                                                    |                                                                                |                                                                                                                                                      |         |              |                                                   |                     |
| TCS001                    | HP:0010301, HP:0000252, HP:0001263                                                 | Rubinstein-Taybi Syndrome 2                                                    | ORPHA353284 (Rubinstein-Taybi syndrome due to EP300 haploinsufficiency)                                                                              | EP300   | 3373         | NM_001429.3:c.5723dupC (p.Thr1909Asnfs*164) (het) | AD                  |
| TCS003                    | HP:0001263, HP:0002650, HP:0001382, HP:0002079, HP:0001999                         | Coffin-Siris syndrome                                                          | ORPHA1465 (Coffin-Siris syndrome)                                                                                                                    | SMARCB1 | 11103        | NM_003073.3:c.364del (p.Glu122Asnfs*21) (het)     | AD                  |
| TCS004                    | HP:0001263, HP:0004322, HP:0100255                                                 | Alazami Syndrome                                                               | ORPHA319671 (Microcephalic primordial dwarfism, Alazami type)                                                                                        | LARP7   | 24912        | NM_016648.2:c.756_757del (p.Arg253Ile*6) (hom)    | AR                  |
| TCS005                    | HP:0007105                                                                         | KAT6B-Related Disorder                                                         | ORPHA85201 (Genitopatellar syndrome), ORPHA3047 (Blepharophimosis-intellectual disability syndrome, SBBYS type) or some other KAT6B-related disorder | KAT6B   | 17582        | NM_012330.3:c.3021+1G>C (p?) (het)                | AD                  |
| TCS006                    | HP:0009372, HP:0001193, HP:0007598, HP:0001762                                     | Type C Brachydactyly                                                           | ORPHA93384 (Brachydactyly type C)                                                                                                                    | GDF5    | 4220         | NM_000557.2:c.847G>A (p.Val283Met) (het)          | AD                  |
| TCS007                    | HP:0001263                                                                         | Neurodegeneration with brain iron accumulation-1 (NBIA1).                      | ORPHA216866 (Classic pantothenate kinase-associated neurodegeneration) or ORPHA157850 (Pantothenate kinase-associated neurodegeneration)             | PANK2   | 15894        | NM_153638.2:c.824_825del (p.Cys276Trpfs*15) (hom) | AR                  |
| TCS008                    | HP:0001263, HP:0002540, HP:0001344, HP:0003693, HP:0001266, HP:0001250, HP:0000563 | Congenital disorder of deglycosylation                                         | ORPHA137 (Congenital disorder of deglycosylation)                                                                                                    | NGLY1   | 17646        | NM_018297.3:c.1201A>T (p.Arg401*) (hom)           | AR                  |
| TCS009                    | HP:0000256, HP:0002126, HP:0410009, HP:0012210, HP:0003302, HP:0011342             | Megalencephaly-polymicrogyria-polydactyly-hydrocephalus syndrome-1 (MPPH)      | ORPHA83473 (Megalencephaly-polymicrogyria-postaxial polydactyly-hydrocephalus syndrome)                                                              | PIK3R2  | 8980         | NM_181523.2:c.1117G>A (p.Gly373Arg) (het)         | AD                  |
| TCS010                    | HP:0000252, HP:0001252, HP:0001250                                                 | Early Infantile Epileptic Encephalopathy 5.                                    | ORPHA1934 (Early infantile epileptic encephalopathy)                                                                                                 | SPTAN1  | 11273        | NM_001130438.2:c.6947A>C (p.Gln2316Pro) (het)     | AD                  |
| TCS012                    | HP:0001266, HP:0001263, HP:0001321, HP:0011968                                     | Pontocerebellar Hypoplasia Type 2A.                                            | ORPHA2524 (Pontocerebellar hypoplasia type 2)                                                                                                        | TSEN54  | 27561        | NM_207346.2:c.919G>T (p.Ala307Ser) (hom)          | AR                  |
| TCS013                    | HP:0001519, HP:0011342, HP:0002194                                                 | Sotos Syndrome                                                                 | ORPHA821 (Sotos syndrome)                                                                                                                            | NSD1    | 14234        | NM_022455.4:c.3922-1G>C (p.?) (het)               | AD                  |
| TCS014                    | HP:0012209, HP:0001642                                                             | Noonan Syndrome-like disorder with or without juvenile myelomonocytic leukemia | ORPHA363972 (Noonan syndrome-like disorder with juvenile myelomonocytic leukemia)                                                                    | CBL     | 1541         | NM_005188.3:c.1096-11_1109del (p.?) (het)         | AD                  |

## Test Cases

|        |                                                                                                                                                |                                                                                                   |                                                                                                                                                                                                                                                                       |                  |              |                                                                                                                |    |
|--------|------------------------------------------------------------------------------------------------------------------------------------------------|---------------------------------------------------------------------------------------------------|-----------------------------------------------------------------------------------------------------------------------------------------------------------------------------------------------------------------------------------------------------------------------|------------------|--------------|----------------------------------------------------------------------------------------------------------------|----|
| TCS015 | HP:0001508, HP:0001250, HP:0000256, HP:0001334, HP:0002921, HP:0002020, HP:0000545, HP:0001252, HP:0011675, HP:0000483, HP:0001647, HP:0001875 | Autosomal Dominant Mental Retardation 17.                                                         | ORPHA329224 (Intellectual disability-craniofacial dysmorphism-cryptorchidism syndrome)                                                                                                                                                                                | PACS1            | 30032        | NM_018026.3:c.607C>T (p.Arg203Trp) (het)                                                                       | AD |
| TCS016 | HP:0001252, HP:0001263, HP:0000924                                                                                                             | Mental retardation autosomal dominant 23                                                          | ORPHA404440 (Intellectual disability-facial dysmorphism syndrome due to SETD5 haploinsufficiency)                                                                                                                                                                     | SETD5            | 25566        | NM_001080517:c.1576_1580del (p.Glu526Lysfs*15) (het)                                                           | AD |
| TCS017 | HP:0000558, HP:0000668, HP:0001999                                                                                                             | SHORT syndrome                                                                                    | ORPHA3163 (SHORT syndrome)                                                                                                                                                                                                                                            | PIK3R1           | 8979         | NM_181523.2:c.1993G>A (p.Gly665Ser) (het)                                                                      | AD |
| TCS018 | HP:0000407, HP:0000717, HP:0001638                                                                                                             | Autosomal Recessive hearing loss caused by GJB2 variant.                                          | ORPHA90636 (Autosomal recessive non-syndromic sensorineural deafness type DFNB)                                                                                                                                                                                       | GJB2             | 4284         | NM_004004.5:c.35delG (p.Gly12Valfs*2) (hom)                                                                    | AR |
| TCS021 | HP:0001107, HP:0001249, HP:0001513, HP:0007018                                                                                                 | Oculocutaneous albinism type 1 and MC4R-linked obesity?                                           | ORPHA352731 (Oculocutaneous albinism type 1)                                                                                                                                                                                                                          | TYR and MC4R     | 12442, 6932  | NM_000372.4:c.1118C>A (p.Thr373Lys) (het)/c.1205G>A (p.Arg402Gln) (het) and NM_005912.2:c.307G>A (p.Val103Ile) | AR |
| TCS022 | HP:0000519, HP:0001263                                                                                                                         | COL4A1-Related Disorder                                                                           | ORPHA75326 (Retinal arterial tortuosity), ORPHA73229 (Autosomal dominant familial hematuria-retinal arteriolar tortuosity-contractures syndrome ), ORPHA36383 (Familial vascular leukoencephalopathy), ORPHA2940 (Porencephaly) or ORPHA99810 (Familial porencephaly) | COL4A1           | 2202         | NM_001845.4:c.2317G>A (p.Gly773Arg) (het)                                                                      | AD |
| TCS024 | HP:0002510, HP:0001263, HP:0001250, HP:0001508, HP:0000505, HP:0001537                                                                         | Congenital disorder of glycosylation, type Iv and Congenital disorder of glycosylation, type Iii. | ORPHA263487 (COG5-CDG)                                                                                                                                                                                                                                                | NGLY1 and COG5   | 17646, 14857 | NM_001145294.1:c.517A>G p.Arg173Gly (hom) and NM_006348.3:c.1205C>T (p.Ser402Leu) (hom)                        | AR |
| TCS025 | HP:0006852, HP:0002376, HP:0001945                                                                                                             | CAPOS Syndrome and global developmental delay/Autism Spectrum disorder                            | ORPHA1171 (Cerebellar ataxia-areflexia-pes cavus-optic atrophy-sensorineural hearing loss syndrome)                                                                                                                                                                   | ATP1A3 and NRXN1 | 801, 8008    | arr 2p16.3 (51,021,507-51,358,841)x1 and NM_152296.4:c.2485G>A (p.Glu818Lys) (het)                             | AD |
| TCS026 | HP:0005484, HP:0001263, HP:0002376, HP:0002123                                                                                                 | Pontocerebellar hypoplasia, type 2E                                                               | ORPHA247198 (Progressive cerebello-cerebral atrophy)                                                                                                                                                                                                                  | VPS53            | 25608        | NM_018289:c.1429C>T (p.Arg477*)c.1716T>G (p.Ser572Arg)                                                         | AR |

## Test Cases

|                      |                                                                                                                                                                                                                                    |                                                                               |                                                                                                                                |          |       |                                                       |    |
|----------------------|------------------------------------------------------------------------------------------------------------------------------------------------------------------------------------------------------------------------------------|-------------------------------------------------------------------------------|--------------------------------------------------------------------------------------------------------------------------------|----------|-------|-------------------------------------------------------|----|
| TCS027               | HP:0009885, HP:0001087, HP:0001508, HP:0000252, HP:0030048, HP:0003072, HP:0000280, HP:0001252                                                                                                                                     | Nicolaides-Baraitser syndrome                                                 | ORPHA3051 (Intellectual disability-sparse hair-brachydactyly syndrome)                                                         | SMARCA2  | 11098 | NM_003070:c.2639C>T (p.Thr880Ile)                     | AD |
| TCS028               | HP:0001250, HP:0001508, HP:0001999, HP:0000260, HP:0001382, HP:0000592, HP:0001263, HP:0001631, HP:0001943, HP:0002757, HP:0000938, HP:0001385, HP:0001903                                                                         | Cutis laxa, type IIIA                                                         | ORPHA35664 (ALDH18A1-related De Barys syndrome) or ORPHA2962 (De Barys syndrome) or ORPHA90348 (Autosomal dominant cutis laxa) | ALDH18A1 | 9722  | NM_002860:c.1321C>T (p.Arg441*)/c.191G>A (p.Arg64His) | AR |
| <b>Bone et al</b>    |                                                                                                                                                                                                                                    |                                                                               |                                                                                                                                |          |       |                                                       |    |
| TCS031               | HP:0000256, HP:0000708, HP:0000718, HP:0001065, HP:0001251, HP:0001263, HP:0001290, HP:0001513, HP:0001770, HP:0001985, HP:0001999, HP:0002020, HP:0002028, HP:0002342, HP:0002360, HP:0002650, HP:0008542, HP:0011412, HP:0100512 | Smith-Magenis                                                                 | ORPHA819 (Smith-Magenis syndrome)                                                                                              | RAI1     | 9834  | NM_030665.3:c.[2273G>A];[=]                           |    |
| TCS036               | HP:0000708, HP:0001250, HP:0001257, HP:0002342, HP:0007319                                                                                                                                                                         | Combined oxidative phosphorylation deficiency 12                              | ORPHA314051 (Leukoencephalopathy-thalamus and brainstem anomalies-high lactate syndrome)                                       | AARS2    | 21022 | c.[1949G>A];                                          |    |
| TCS039               | HP:0000518, HP:0001257, HP:0001288, HP:0002500, HP:0002518, HP:0003487, HP:0006858, HP:0006886, HP:0006937, HP:0010829, HP:0011448, HP:0011449, HP:0012534, HP:0100561                                                             | Hypomyelination with brainstem and spinal cord involvement and leg spasticity | ORPHA363412 (Hypomyelination with brain stem and spinal cord involvement and leg spasticity)                                   | DARS     | 2678  | NM_001349.2:c.[839A>T]; [1099G>C]                     |    |
| <b>Stelzer et al</b> |                                                                                                                                                                                                                                    |                                                                               |                                                                                                                                |          |       |                                                       |    |
| TCS041               | HP:0030005                                                                                                                                                                                                                         | Capillary leak syndrome                                                       | ORPHA188 (Systemic capillary leak syndrome)                                                                                    | TLN1     | 11845 |                                                       |    |
| TCS043               | HP:0002804, HP:0002803                                                                                                                                                                                                             | Arthrogryposis multiplex congenita                                            | ORPHA1037 (Arthrogryposis multiplex congenita)                                                                                 | MYBPC    | 7550  |                                                       |    |
| <b>Lee et al</b>     |                                                                                                                                                                                                                                    |                                                                               |                                                                                                                                |          |       |                                                       |    |
| TCS044               | HP:0002376, HP:0001250                                                                                                                                                                                                             | ceroid-lipofuscinosis, neuronal 8 [MIM: 600143]                               | OR:168491, OR:228354, OR:79264                                                                                                 | CLN8     |       | p.Arg204Cys                                           |    |

## Test Cases

|        |                                                                                                                                                |                                                                                                                                                                                                                                                                                                |                                                                                                        |          |  |                 |  |
|--------|------------------------------------------------------------------------------------------------------------------------------------------------|------------------------------------------------------------------------------------------------------------------------------------------------------------------------------------------------------------------------------------------------------------------------------------------------|--------------------------------------------------------------------------------------------------------|----------|--|-----------------|--|
| TCS045 | HP:0001251, HP:0012444, HP:0000518, HP:0001272, HP:0002503, HP:0001263, HP:0001332, HP:0001252, HP:0002418, HP:0001270, HP:0012179, HP:0001257 | autosomal recessive Joubert syndrome 3 [MIM: 608629]                                                                                                                                                                                                                                           | OR:220493                                                                                              | AHI1     |  | p.Glu1086Gly    |  |
| TCS046 | HP:0007703, HP:0000662, HP:0000662, HP:0000510, HP:0000572                                                                                     | autosomal recessive Retinitis Pigmentosa type 39 [MIM: 613809]                                                                                                                                                                                                                                 | OR:791                                                                                                 | USH2A    |  | p.Cys759Phe     |  |
| TCS047 | HP:0001251, HP:0001272, HP:0001251                                                                                                             | autosomal recessive spinocerebellar ataxia type 8 (SCAR8) [MIM: 610743]                                                                                                                                                                                                                        | OR:88644                                                                                               | SYNE1    |  | Splice Defect   |  |
| TCS048 | HP:0001274, HP:0002019, HP:0001999, HP:0000365, HP:0001609, HP:0000601, HP:0001302, HP:0000750                                                 | autosomal recessive primary microcephaly type 3 [MIM: 604804]                                                                                                                                                                                                                                  | OR:2512                                                                                                | CDK5RAP2 |  | p.Arg1481*      |  |
| TCS049 | HP:0007366, HP:0001272, HP:0001347, HP:0001251, HP:0000365, HP:0001347                                                                         | autosomal recessive Spastic Paraplegia type 7 [MIM: 607259]                                                                                                                                                                                                                                    | OR:99013                                                                                               | SPG7     |  | p.Gly577Ser     |  |
| TCS050 | HP:0007875, HP:0000622, HP:0000551, HP:0000639, HP:0007702, HP:0007980, HP:0000510, HP:0000510                                                 | autosomal recessive cone-rod dystrophy 13 [MIM: 608194]                                                                                                                                                                                                                                        | OR:1872                                                                                                | RPGRIP1  |  | p.Asp966Ilefs   |  |
| TCS051 | HP:0002804, HP:0001533, HP:0000518, HP:0001999, HP:0001328, HP:0001324, HP:0003560, HP:0002650, HP:0004322                                     | Muscular dystrophy-dystroglycanopathy (congenital with brain and eye anomalies), type A, 14 [MIM: 615350]; Muscular dystrophy-dystroglycanopathy (congenital with mental retardation), type B, 14 [MIM: 615351]; Muscular dystrophy-dystroglycanopathy (limb-girdle), type C, 14 [MIM: 615352] | OR:363623, OR:370959, OR:370968, OR:588                                                                | GMPPB    |  | p.Arg185Cys     |  |
| TCS052 | HP:0000823, HP:0001263, HP:0001288, HP:0001347, HP:0040075, HP:0030353, HP:0004322, HP:0012506, HP:0008734                                     | autosomal recessive Woodhouse-Sakati Syndrome [MIM: 241080]                                                                                                                                                                                                                                    | OR:3464                                                                                                | DCAF17   |  | p.Ile97Asnfs*22 |  |
| TCS053 | HP:0001251, HP:0002415, HP:0009830, HP:0002500                                                                                                 | autosomal recessive adult polyglucosan body disease [MIM: 263570]; glycogen storage disease type IV [MIM: 232500]                                                                                                                                                                              | OR:206583, OR:308621, OR:308638, OR:308655, OR:308670, OR:308684, OR:308698, OR:308712, OR:367, OR:367 | GBE1     |  | p.Tyr329Ser     |  |
| TCS054 | HP:0000717, HP:0001638, HP:0003560, HP:0003201                                                                                                 | Duchenne muscular dystrophy (DMD) [MIM: 310200]                                                                                                                                                                                                                                                | OR:98896                                                                                               | DMD      |  | p.Gly1334*      |  |

## Test Cases

|        |                                                                                                                        |                                                                                                                                                                                                    |                             |         |  |                            |  |
|--------|------------------------------------------------------------------------------------------------------------------------|----------------------------------------------------------------------------------------------------------------------------------------------------------------------------------------------------|-----------------------------|---------|--|----------------------------|--|
| TCS055 | HP:0002910, HP:0010526, HP:0002415, HP:0100513, HP:0001328, HP:0001257, HP:0006827, HP:0002493, HP:0002500             | X-linked chronic non-spherocytic hemolytic anemia due to G6PD deficiency [MIM: 305900]                                                                                                             |                             | G6PD    |  | p.Ser188Phe                |  |
| TCS056 | HP:0005110, HP:0001638, HP:0001633, HP:0001634                                                                         | Cardiomyopathy, dilated, 1G [MIM: 604145]; Cardiomyopathy, familial hypertrophic, 9 [MIM: 613765]                                                                                                  | OR:154                      | TTN     |  | p.Asp17434Gly, p.Cys12844* |  |
| TCS057 | HP:0001251                                                                                                             | SYNE1-related autosomal recessive cerebellar ataxia (also known as autosomal recessive cerebellar ataxia type 1 or ARCA1) [MIM: 610743]                                                            | OR:88644                    | SYNE1   |  | Splice defect, p.Lys3216*  |  |
| TCS058 | HP:0001251, HP:0001272, HP:0012103                                                                                     | SYNE1-related autosomal recessive cerebellar ataxia (also known as autosomal recessive cerebellar ataxia type 1 or ARCA1) [MIM: 610743]                                                            | OR:88644                    | SYNE1   |  | p.Arg6684*, p.Trp2646*     |  |
| TCS059 | HP:0000978, HP:0001873                                                                                                 | autosomal recessive Glanzmann thrombasthenia [MIM: 273800]                                                                                                                                         | OR:849                      | ITGA2B  |  | p.Ile596Thr, p.Leu147Val   |  |
| TCS060 | HP:0011854, HP:0001733, HP:0012330, HP:0001977                                                                         | autosomal recessive Wilson Disease [MIM:277900]                                                                                                                                                    | OR:905                      | ATP7B   |  | p.Asn1270Ser, p.Pro984Ala  |  |
| TCS061 | HP:0007754, HP:0000608, HP:0007754                                                                                     | autosomal recessive Stargardt Disease [MIM: 248200]                                                                                                                                                | OR:827                      | ABCA4   |  | p.Gly1961Glu, p.Gly863Ala  |  |
| TCS062 | HP:0000023, HP:0100790                                                                                                 | autosomal recessive 17-beta hydroxysteroid dehydrogenase III deficiency (a.k.a. male pseudohermaphroditism with gynecomastia) [MIM: 264300]                                                        | OR:46, OR:752               | HSD17B3 |  | p.Arg80Gln, p.Ser65Leu     |  |
| TCS063 | HP:0004430, HP:0002721, HP:0001876                                                                                     | Severe combined immunodeficiency due to ADA deficiency [MIM: 102700]                                                                                                                               | OR:277                      | ADA     |  | Splice defect, p.Ala329Val |  |
| TCS064 | HP:0001347, HP:0002415, HP:0009830, HP:0001257, HP:0002500                                                             | autosomal recessive spastic paraplegia type 7 [MIM: 607259]                                                                                                                                        | OR:99013                    | SPG7    |  | p.Ala510Val, p.Ala708Lysfs |  |
| TCS065 | HP:0003326, HP:0002099, HP:0003687, HP:0100749, HP:0012378, HP:0007185, HP:0001324, HP:0003560, HP:0003474, HP:0012531 | autosomal recessive Miyoshi muscular dystrophy-1 [MIM: 254130]; autosomal recessive limb-girdle muscular dystrophy type 2B [MIM: 253601]; distal myopathy with anterior tibial onset [MIM: 606768] | OR:178400, OR:268, OR:45448 | DYSF    |  | p.Arg1693Gln, p.Ser1173*   |  |

## Test Cases

|        |                                                                                                |                                                                                                                                                                                                                                                                                                                                                                           |                                                           |         |  |                                       |  |
|--------|------------------------------------------------------------------------------------------------|---------------------------------------------------------------------------------------------------------------------------------------------------------------------------------------------------------------------------------------------------------------------------------------------------------------------------------------------------------------------------|-----------------------------------------------------------|---------|--|---------------------------------------|--|
| TCS066 | HP:0003326, HP:0003326, HP:0003198                                                             | autosomal recessive limb-girdle muscular dystrophy type 2L [MIM: 611397]                                                                                                                                                                                                                                                                                                  |                                                           | ANO5    |  | p.Asn52Ser, p.Asn64Lys*15             |  |
| TCS067 | HP:0003789, HP:0001324, HP:0003560, HP:0003198                                                 | autosomal recessive congenital neuromuscular disease; central core disease [MIM: 117000]                                                                                                                                                                                                                                                                                  | OR:178145, OR:597, OR:598                                 | RYR1    |  | p.Arg1999Cys, p.Arg2241*, p.Asp708Asn |  |
| TCS068 | HP:0003202, HP:0001324, HP:0003202, HP:0003560                                                 | autosomal recessive limb-girdle muscular dystrophy type 2B [MIM: 253601]                                                                                                                                                                                                                                                                                                  | OR:268                                                    | DYSF    |  | Splice defect, p.Lys1526Thr           |  |
| TCS069 | HP:0002194, HP:0001252, HP:0001324, HP:0003560, HP:0003198, HP:0000508                         | autosomal recessive fetal akinesia deformation sequence [MIM: 208150]; familial limb-girdle myasthenia [MIM: 254300]                                                                                                                                                                                                                                                      | OR:590, OR:98913, OR:994                                  | DOK7    |  | p.Ser422Hisfs*34, p.Ser422Leufs*97    |  |
| TCS070 | HP:0001260, HP:0002094, HP:0002875, HP:0001324, HP:0003560, HP:0003473, HP:0003198, HP:0012764 | autosomal recessive familial limb-girdle myasthenia [MIM: 254300]                                                                                                                                                                                                                                                                                                         | OR:590, OR:98913                                          | DOK7    |  | Splice defect, p.Ala378Serfs*30       |  |
| TCS071 | HP:0001324, HP:0003560                                                                         | autosomal recessive limb-girdle muscular dystrophy (LGMD) type 2A [MIM: 253600]                                                                                                                                                                                                                                                                                           | OR:267                                                    | CAPN3   |  | p.Arg440Gln, p.Glu107*                |  |
| TCS072 | HP:0001263, HP:0001324, HP:0003560, HP:0004322                                                 | autosomal recessive congenital muscular dystrophy (megaconial type) [MIM: 602541]                                                                                                                                                                                                                                                                                         | OR:280671                                                 | CHKB    |  | p.Gln51*, p.Glu283Lys, p.Thr301Ile    |  |
| TCS073 | HP:0011096, HP:0009830, HP:0003474, HP:0003401                                                 | Mitochondrial DNA depletion syndrome 4A (Alpers type) [MIM: 203700]; Mitochondrial DNA depletion syndrome 4B (MNGIE type) [MIM: 613662]; Mitochondrial recessive ataxia syndrome (includes SANDO and SCAE) [MIM: 607459]; Progressive external ophthalmoplegia, autosomal dominant [MIM: 157640]; Progressive external ophthalmoplegia, autosomal recessive [MIM: 258450] | OR:254881, OR:254886, OR:254892, OR:298, OR:70595, OR:726 | POLG    |  | p.Arg852Cys, p.Gly111Asp              |  |
| TCS074 | HP:0009049, HP:0001251, HP:0002196, HP:0009830, HP:0000639, HP:0001257                         | autosomal recessive spastic ataxia Charlevoix-Saguenay type (ARSACS) [MIM: 270550]                                                                                                                                                                                                                                                                                        | OR:98                                                     | SACS    |  | p.Arg2426*, p.Arg3875His              |  |
| TCS075 | HP:0001251, HP:0001263, HP:0001250, HP:0001257, HP:0001337                                     | autosomal recessive citrullinemia [MIM: 215700]                                                                                                                                                                                                                                                                                                                           | OR:247525                                                 | ASS1    |  | p.Arg307Cys, see eTable 3             |  |
| TCS076 | HP:0000551, HP:0000510, HP:0007754, HP:0000662, HP:0000510                                     | late onset retinal degeneration (LORD) [MIM:605670]                                                                                                                                                                                                                                                                                                                       | OR:67042                                                  | C1QTNF5 |  | p.Ser163Arg                           |  |

## Test Cases

|        |                                                                                                                                                                        |                                                                                                                                                                                                                                                                                                                                                      |                                                                                 |        |  |                 |  |
|--------|------------------------------------------------------------------------------------------------------------------------------------------------------------------------|------------------------------------------------------------------------------------------------------------------------------------------------------------------------------------------------------------------------------------------------------------------------------------------------------------------------------------------------------|---------------------------------------------------------------------------------|--------|--|-----------------|--|
| TCS077 | HP:0000169, HP:0001067, HP:0001631, HP:0001647, HP:0002202, HP:0001638, HP:0001627, HP:0001635, HP:0030148, HP:0100026, HP:0011571, HP:0002202, HP:0001642, HP:0001629 | Aortic valve disease [MIM: 109730]                                                                                                                                                                                                                                                                                                                   | OR:402075                                                                       | NOTCH1 |  | p.Glu794SerfsX8 |  |
| TCS078 | HP:0011675, HP:0001695, HP:0001638, HP:0001699                                                                                                                         | dilated cardiomyopathy (DCM) [MIM: 115200]; hypertrophic cardiomyopathy (HCM) [MIM: 115197]                                                                                                                                                                                                                                                          | OR:300751                                                                       | MYBPC3 |  | Splice Defect   |  |
| TCS079 | HP:0004749, HP:0000836, HP:0001638, HP:0012622, HP:0001635, HP:0003077, HP:0000822, HP:0002092, HP:0001645, HP:0004756                                                 | Atrial fibrillation, familial, 10 [MIM: 614022]; Brugada syndrome 1 [MIM: 601144]; Cardiomyopathy, dilated, 1E [MIM: 601154]; Heart block, nonprogressive [MIM: 113900]; Heart block, progressive, type IA [MIM: 113900]; Long QT syndrome-3 [MIM: 603830]; Sick sinus syndrome 1 [MIM: 608567]; Ventricular fibrillation, familial, 1 [MIM: 603829] | OR:101016, OR:130, OR:154, OR:166282, OR:228140, OR:334, OR:768, OR:871, OR:871 | SCN5A  |  | p.Arg523Cys     |  |
| TCS080 | HP:0005110, HP:0001638, HP:0001252, HP:0011106, HP:0002202                                                                                                             | Cardiomyopathy, dilated, 1S [MIM: 613426]; Cardiomyopathy, familial hypertrophic, 1 [MIM: 192600]; Laing distal myopathy [MIM: 160500]; Left ventricular noncompaction 5 [MIM: 613426]; Myopathy, myosin storage [MIM: 608358]; Scapuloperoneal syndrome, myopathic type [MIM: 181430]                                                               | OR:154, OR:154, OR:437572, OR:53698, OR:54260, OR:54260, OR:59135               | MYH7   |  | p.Met515Thr     |  |
| TCS081 | HP:0001631, HP:0000518, HP:0000175, HP:0000568, HP:0001643                                                                                                             | oculofaciocardiodental (OFCD) syndrome [MIM: 300166]                                                                                                                                                                                                                                                                                                 | OR:2712, OR:568                                                                 | BCOR   |  | p.Gln1337*      |  |
| TCS082 | HP:0002617, HP:0012727, HP:0012727                                                                                                                                     | autosomal dominant familial thoracic aortic aneurysm type 7 [MIM: 613780]                                                                                                                                                                                                                                                                            | OR:91387                                                                        | MYLK   |  | p.Asp717Tyr     |  |
| TCS083 | HP:0001382, HP:0011729, HP:0003011 and HP:0000924, HP:0012531, HP:0010647                                                                                              | autosomal dominant Ehlers-Danlos syndrome, hypermobility type [MIM: 130020]                                                                                                                                                                                                                                                                          | OR:285                                                                          | TNXB   |  | p.Asp2025Val    |  |

## Test Cases

|        |                                                                                                                                    |                                                                                                                                                                                                                                                                                                                                                                |                                                                       |          |  |             |  |
|--------|------------------------------------------------------------------------------------------------------------------------------------|----------------------------------------------------------------------------------------------------------------------------------------------------------------------------------------------------------------------------------------------------------------------------------------------------------------------------------------------------------------|-----------------------------------------------------------------------|----------|--|-------------|--|
| TCS084 | HP:0009049, HP:0002380, HP:0009027, HP:0001288, HP:0002380, HP:0001324, HP:0009830                                                 | Charcot-Marie-Tooth disease, dominant intermediate D [MIM: 607791]; Charcot-Marie-Tooth disease, type 1B [MIM: 118200]; Charcot-Marie-Tooth disease, type 2I [MIM: 607677]; Charcot-Marie-Tooth disease, type 2J [MIM: 607736]; Dejerine-Sottas disease [MIM: 145900]; Neuropathy, congenital hypomyelinating [MIM: 605253]; Roussy-Levy syndrome [MIM:180800] | OR:100046, OR:101082, OR:3115, OR:64748, OR:99942, OR:99943, OR:99951 | MPZ      |  | p.Pro151Thr |  |
| TCS085 | HP:0003234, HP:0003394, HP:0012378, HP:0001945, HP:0001427, HP:0003326, HP:0001954, HP:0002094                                     | autosomal dominant familial periodic fever [MIM: 142680]                                                                                                                                                                                                                                                                                                       | OR:32960                                                              | TNFRSF1A |  | p.Arg121Gln |  |
| TCS086 | HP:0002067, HP:0002483, HP:0001268, HP:0002307, HP:0001332, HP:0000712, HP:0000298, HP:0003470, HP:0002371, HP:0002015, HP:0000511 | autosomal dominant Parkinson Disease type 11 [MIM: 607688]                                                                                                                                                                                                                                                                                                     | OR:411602                                                             | GIGYF2   |  | p.Ala793Val |  |
| TCS087 | HP:0010463, HP:0002617, HP:0001369, HP:0008724, HP:0010511/HP:0100807, HP:0002758, HP:0000939, HP:0000541, HP:0002650              | autosomal dominant Loews-Dietz syndrome [MIM: 610168, 610380]                                                                                                                                                                                                                                                                                                  | OR:284973, OR:558, OR:60030, OR:91387                                 | TGFBR2   |  | p.Tyr470Asp |  |
| TCS088 | HP:0001430, HP:0009049, HP:0009027, HP:0003394, HP:0002487, HP:0009830                                                             | 2-aminoadipic 2-oxoadipic aciduria [MIM: 204750]; Charcot-Marie-Tooth disease, axonal, type 2Q [MIM: 615025]                                                                                                                                                                                                                                                   | OR:329258, OR:79154                                                   | DHTKD1   |  | p.Arg834*   |  |
| TCS089 | HP:0000048, HP:0000047, HP:0100600, HP:0000028                                                                                     | 46XY sex reversal type 6 [MIM: 613762]                                                                                                                                                                                                                                                                                                                         | OR:242, OR:251510                                                     | MAP3K1   |  | p.Pro257Leu |  |
| TCS090 | HP:0002863, HP:0001903, HP:0001876                                                                                                 | Emberger syndrome [MIM: 614038]; Immunodeficiency 21 [MIM: 614172]                                                                                                                                                                                                                                                                                             | OR:228423, OR:3226                                                    | GATA2    |  | p.Asn371Lys |  |
| TCS091 | HP:0003560, HP:0003198, HP:0002380, HP:0002515, HP:0003324                                                                         | Amyotrophic lateral sclerosis 14, with or without frontotemporal dementia [MIM: 613954]; Inclusion body myopathy with early-onset Paget disease and frontotemporal dementia 1 [MIM: 167320]                                                                                                                                                                    | OR:275872, OR:52430, OR:803                                           | VCP      |  | p.Arg155Gly |  |



## Test Cases

|        |                                                                                    |                                                                                                                                                                                                 |                                                                                      |        |  |                  |  |
|--------|------------------------------------------------------------------------------------|-------------------------------------------------------------------------------------------------------------------------------------------------------------------------------------------------|--------------------------------------------------------------------------------------|--------|--|------------------|--|
| TCS092 | HP:0007269, HP:0003324                                                             | autosomal dominant spastic paraplegia type 4 [MIM: 182601]                                                                                                                                      | OR:100985                                                                            | SPAST  |  | p.Asp542Gly      |  |
| TCS093 | HP:0001251, HP:0001272, HP:0000365, HP:0000726, HP:0000365, HP:0009830, HP:0001257 | autosomal dominant hereditary sensory neuropathy type E1 [MIM: 614116]                                                                                                                          | OR:456318                                                                            | DNMT1  |  | p.Tyr511Cys      |  |
| TCS094 | HP:0011675, HP:0001279, HP:0012668                                                 | autosomal dominant Brugada syndrome-1 [MIM: 601144]                                                                                                                                             | OR:130                                                                               | SCN5A  |  | p.Ser1710Leu     |  |
| TCS095 | HP:0001999, HP:0001562, HP:0000938, HP:0002652                                     | autosomal dominant osteogenesis imperfecta (OI), type II [MIM:166210]; OI, type III [MIM: 259420]; OI, type IV [MIM: 166220]; autosomal dominant Ehlers-Danlos syndrome type VIIB [MIM: 130060] | OR:1899, OR:216804, OR:216812, OR:216820, OR:666, OR:666, OR:666, OR:99875, OR:99876 | COL1A2 |  | p.Gly1012Ser     |  |
| TCS096 | HP:0001288, HP:0100021, HP:0001263, HP:0002141, HP:0002136                         | autosomal dominant Angelman syndrome [MIM: 105830]                                                                                                                                              | OR:72                                                                                | UBE3A  |  | p.Leu825Phefs*15 |  |
| TCS097 | HP:0002888, HP:0002888                                                             | autosomal dominant Li-Fraumeni Syndrome [MIM: 151623]                                                                                                                                           | OR:524                                                                               | TP53   |  | p.Arg158His      |  |
| TCS098 | HP:0002607, HP:0100568, HP:0012378, HP:0000131, HP:0002895, HP:0002668, HP:0001337 | autosomal dominant hereditary paraganglioma type 1 [MIM: 168000]                                                                                                                                | OR:29072                                                                             | SDHD   |  | p.Pro81Leu       |  |
| TCS099 | HP:0100568, HP:0002668                                                             | autosomal dominant paragangliomas [MIM: 115310]                                                                                                                                                 | OR:29072                                                                             | SDHB   |  | p.Arg90*         |  |
| TCS100 | HP:0000589, HP:0001263, HP:0000639, HP:0001642, HP:0004322, HP:0004381, HP:0001642 | autosomal dominant Noonan Syndrome 1 [MIM: 163950]                                                                                                                                              | OR:648                                                                               | PTPN11 |  | p.Asn308Asp      |  |
| TCS101 | HP:0001724, HP:0001647, HP:0000164, HP:0001679, HP:0001627, HP:0000975, HP:0008404 | autosomal dominant pachyonychia congenita [MIM: 167200]                                                                                                                                         | OR:2309                                                                              | KRT16  |  | p.Gln122Arg      |  |

## Test Cases

|        |                                                                                                                                                            |                                                                                                                                                                               |                                                             |         |  |                                           |  |
|--------|------------------------------------------------------------------------------------------------------------------------------------------------------------|-------------------------------------------------------------------------------------------------------------------------------------------------------------------------------|-------------------------------------------------------------|---------|--|-------------------------------------------|--|
| TCS102 | HP:0005321, HP:0002059, HP:0000453, HP:0000028, HP:0001263, HP:0001999, HP:0002032, HP:0002937, HP:0000023, HP:0040064, HP:0000272, HP:0000308, HP:0002878 | autosomal dominant mandibulofacial dysostosis, Guion-Almeida type [MIM: 610536]                                                                                               | OR:79113                                                    | EFTUD2  |  | Splice Defect                             |  |
| TCS103 | HP:0001251, HP:0001268, HP:0000726, HP:0002415, HP:0009830, HP:0000572, HP:0002500                                                                         | autosomal dominant cerebral arteriopathy with subcortical infarcts; leukoencephalopathy [MIM: 125310]                                                                         | OR:136                                                      | NOTCH3  |  | p.Arg1231Cys                              |  |
| TCS104 | HP:0012244, HP:0008723                                                                                                                                     | 46XY sex reversal 3 [MIM: 612965]; Adrenocortical insufficiency; Premature ovarian failure 7 [MIM: 612964]; Spermatogenic failure 8 [MIM: 613957]                             | OR:242, OR:251510, OR:399805                                | NR5A1   |  | p.Tyr404Asp                               |  |
| TCS105 | HP:0005227, HP:0002097, HP:0002097, HP:0010566                                                                                                             | autosomal dominant Birt-Hogg-Dube syndrome [MIM: 135150]; autosomal dominant primary spontaneous pneumothorax [MIM: 173600]                                                   | OR:122, OR:2903                                             | FLCN    |  | p.His429Thrfs*39                          |  |
| TCS106 | HP:0002313, HP:0001257                                                                                                                                     | autosomal dominant spastic paraplegia 4 [MIM: 182601]                                                                                                                         | OR:100985                                                   | SPAST   |  | p.Arg562Gln                               |  |
| TCS107 | HP:0007018, HP:0003761, HP:0000646, HP:0012803, HP:0001396, HP:0001263, HP:0000565, HP:0010313, HP:0001399, HP:0000722, HP:0001250, HP:0007902             | autosomal dominant hyperphosphatemic familial tumoral calcinosis [MIM: 211900]                                                                                                | OR:306661, OR:53715                                         | FGF23   |  | p.Gly87Asp                                |  |
| TCS108 | HP:0011157, HP:0001510, HP:0001328, HP:0001250                                                                                                             | X-linked female-restricted early infantile epileptic encephalopathy type 9 (EIEE9) or Juberg-Hellman Syndrome [MIM: 300088]                                                   | OR:101039, OR:2076                                          | PCDH19  |  | p.Ala153Ile                               |  |
| TCS109 | HP:0000365, HP:0000365, HP:0001875, HP:0002895                                                                                                             | autosomal dominant Emberger syndrome [MIM: 614038]                                                                                                                            | OR:3226                                                     | GATA2   |  | p.Tyr376Profs*9                           |  |
| TCS110 | HP:0001251, HP:0000819, HP:0000639                                                                                                                         | autosomal dominant spinocerebellar ataxia-6 [MIM:183086]; episodic ataxia type 2 [MIM:108500]; familial hemiplegic migraine-1 with progressive cerebellar ataxia [MIM:141500] | OR:569, OR:97, OR:98758                                     | CACNA1A |  | p.Asp302Asn                               |  |
| TCS111 | HP:0009049, HP:0001288, HP:0009830                                                                                                                         | autosomal recessive Charcot-Marie-Tooth disease [MIM: 607831, 607706, 608340, 21440]                                                                                          | OR:101097, OR:101097, OR:217055, OR:440, OR:90797, OR:99944 | GDAP1   |  | p.Asp21Alafs*23, p.Met116Thr, p.Pro392Ser |  |

## Test Cases

|        |                                                                                                                                                            |                                                                                                                                   |                             |        |  |               |  |
|--------|------------------------------------------------------------------------------------------------------------------------------------------------------------|-----------------------------------------------------------------------------------------------------------------------------------|-----------------------------|--------|--|---------------|--|
| TCS112 | HP:0100021, HP:0002019, HP:0001263, HP:0002151, HP:0030895, HP:0001276, HP:0001252                                                                         | Pitt-Hopkins Syndrome [MIM: 610954]                                                                                               | OR:2896                     | TCF4   |  | Splice defect |  |
| TCS113 | HP:0009049, HP:0003391, HP:0003011, HP:0003202, HP:0001324, HP:0009830, HP:0007269, HP:0040083                                                             | Bethlem myopathy [MIM: 158810]; Myosclerosis, congenital [MIM: 255600]; Ullrich congenital muscular dystrophy [MIM: 254090]       | OR:289380, OR:610, OR:75840 | COL6A2 |  | p.Gly699Asp   |  |
| TCS114 | HP:0000787, HP:0012444, HP:0001263, HP:0000826, HP:0011157, HP:0001276, HP:0001257                                                                         | Mowat-Wilson syndrome [MIM: 235730]                                                                                               | OR:2152                     | ZEB2   |  | p.Asp978Tyr   |  |
| TCS115 | HP:0001263, HP:0011157, HP:0001263, HP:0001250, HP:0003643                                                                                                 | malignant migrating partial seizures of infancy (MMPSI)                                                                           |                             | KCNT1  |  | p.Arg474His   |  |
| TCS116 | HP:0001999, HP:0002553, HP:0000218, HP:0000750, HP:0000400, HP:0000527, HP:0000637, HP:0000750, HP:0000682                                                 | autosomal dominant Cornelia de Lange syndrome 4 [MIM: 614701]                                                                     | OR:199                      | RAD21  |  | p.Leu603Pro   |  |
| TCS117 | HP:0011927, HP:0100249, HP:0002363, HP:0004484, HP:0000365, HP:0001999, HP:0000968, HP:0000238, HP:0011729, HP:0001270, HP:0000407, HP:0000924, HP:0000407 | fibrodysplasia ossificans progressive (FOP) [MIM: 135100]                                                                         | OR:337                      | ACVR1  |  | p.Arg258Gly   |  |
| TCS118 | HP:0001263, HP:0000388, HP:0001250, HP:0002013                                                                                                             | early infantile epileptic encephalopathy type 11 [MIM: 613721] or benign familial infantile seizures type 3 [MIM: 607745]         | OR:140927, OR:1934, OR:306  | SCN2A  |  | p.Ser987Ile   |  |
| TCS119 | HP:0000365, HP:0001263, HP:0000365, HP:0012469, HP:0001250                                                                                                 | Cognitive impairment with or without cerebellar ataxia [MIM: 614306]; Epileptic encephalopathy, early infantile, 13 [MIM: 614558] | OR:442835                   | SCN8A  |  | p.Arg850Gln   |  |
| TCS120 | HP:0000483, HP:0001263, HP:0001999, HP:0000316, HP:0001252, HP:0000639, HP:0001642, HP:0000026                                                             | autosomal dominant Noonan Syndrome type 3 [MIM: 609942]                                                                           | OR:648                      | KRAS   |  | p.Asp153Val   |  |

## Test Cases

|        |                                                                                                                                                            |                                                                                                                         |                            |             |  |                   |  |
|--------|------------------------------------------------------------------------------------------------------------------------------------------------------------|-------------------------------------------------------------------------------------------------------------------------|----------------------------|-------------|--|-------------------|--|
| TCS121 | HP:0011448, HP:0012443, HP:0001272, HP:0001321, HP:0002169, HP:0005280, HP:0001263, HP:0001347, HP:0002509, HP:0008936                                     | Dystonia 4, torsion, autosomal dominant [MIM: 128101]; Leukodystrophy, hypomyelinating, 6 [MIM: 612438]                 | OR:139441, OR:98805        | TUBB4A      |  | p.Val255Ile       |  |
| TCS122 | HP:0030148, HP:0000238, HP:0004415, HP:0001263, HP:0001999, HP:0001250                                                                                     | autosomal dominant Cardiofaciocutaneous Syndrome (CFCS) [MIM: 115150]                                                   | OR:1340                    | MAP2K2      |  | p.Lys61Glu        |  |
| TCS123 | HP:0001263, HP:0001999, HP:0001891, HP:0001508, HP:0004322, HP:0000486, HP:0004324                                                                         | autosomal dominant mental retardation type 7 [MIM:614104]                                                               | OR:178469                  | DYRK1A      |  | p.Tyr104 *        |  |
| TCS124 | HP:0008689, HP:0002019, HP:0001263, HP:0012572, HP:0002039, HP:0000238, HP:0001252, HP:0000023, HP:0001601, HP:0100559, HP:0100259                         | megalencephaly-capillary malformation-polymicrogyria syndrome (MCAP) [MIM: 602501]                                      | OR:60040                   | PIK3CA      |  | p.Gly914Arg       |  |
| TCS125 | HP:0001288, HP:0007018, HP:0000717, HP:0001999, HP:0001621, HP:0001427, HP:0003560, HP:0000722                                                             | intellectual disability with language impairment; autistic features [MIM: 613670]                                       | OR:391372                  | FOXP1       |  | p.Val423His fs*37 |  |
| TCS126 | HP:0003487, HP:0002415, HP:0001427, HP:0003808, HP:0002385, HP:0001257, HP:0003324                                                                         | autosomal dominant Aicardi-Goutieres syndrome type 6 [MIM: 615010]; dyschromatosis symmetrica hereditaria [MIM: 127400] | OR:41, OR:51               | ADAR        |  | p.Gly1007Arg      |  |
| TCS127 | HP:0001263, HP:0001999, HP:0001510, HP:0001252, HP:0000347, HP:0000568, HP:0000588, HP:0001144, HP:0000767, HP:0001510, HP:0000541, HP:0002967, HP:0004492 | Wiedemann-Steiner syndrome [MIM: 605130]                                                                                | OR:319182                  | KMT2A(M LL) |  | Splice defect     |  |
| TCS128 | HP:0007875, HP:0007401, HP:0000639, HP:0001105, HP:0030532                                                                                                 | Cone-rod retinal dystrophy-2 [MIM: 120970]; Leber congenital amaurosis 7 [MIM: 613829]                                  | OR:1872, OR:65             | CRX         |  | p.Glu42Lys        |  |
| TCS129 | HP:0001263, HP:0001999, HP:0011157, HP:0001385, HP:0001382, HP:0001388, HP:0001250                                                                         | Turner type intellectual disability syndrome [MIM: 300706]                                                              | OR:85328                   | HUWE1       |  | p.Ala1338Val      |  |
| TCS130 | HP:0001263, HP:0011157, HP:0011968, HP:0002020, HP:0004305, HP:0000787, HP:0000787, HP:0001583, HP:0001250, HP:0002179, HP:0002013                         | Epileptic encephalopathy, early infantile, 11 [MIM: 613721]; seizures, benign familial infantile, 3 [MIM: 607745]       | OR:140927, OR:1934, OR:306 | SCN2A       |  | p.Arg853Gln       |  |

## Test Cases

|        |                                                                                                                                                                        |                                                                                                                                                                                         |                                              |        |  |                   |  |
|--------|------------------------------------------------------------------------------------------------------------------------------------------------------------------------|-----------------------------------------------------------------------------------------------------------------------------------------------------------------------------------------|----------------------------------------------|--------|--|-------------------|--|
| TCS131 | HP:0000717, HP:0003688, HP:0001263, HP:0011157, HP:0001276, HP:0001427, HP:0001250, HP:0002179, HP:0000637                                                             | Epileptic encephalopathy, early infantile, 11 [MIM: 613721]; seizures, benign familial infantile, 3 [MIM: 607745]                                                                       | OR:140927, OR:1934, OR:306                   | SCN2A  |  | p.Glu1211Lys      |  |
| TCS132 | HP:0000324, HP:0001263, HP:0004325, HP:0004322                                                                                                                         | X-linked dominant Cornelia de Lange Syndrome [MIM: 308821]                                                                                                                              |                                              | HDAC8  |  | Splice defect     |  |
| TCS133 | HP:0001643, HP:0012443, HP:0004484, HP:0001263, HP:0001999, HP:0001252, HP:0002637, HP:0000347, HP:0001643                                                             | autosomal dominant Beckwith-Wiedemann syndrome [MIM: 130650]; autosomal dominant Sotos syndrome 1 [MIM: 117550]                                                                         | OR:116, OR:821                               | NSD1   |  | p.Gln784*         |  |
| TCS134 | HP:0000987, HP:0006337, HP:0010566, HP:0000365, HP:0002808, HP:0000132, HP:0002076, HP:0000826, HP:0100699, HP:0002650, HP:0000360                                     | autosomal dominant PTEN hamartoma tumor syndrome including Bannayan-Riley-Ruvalcaba syndrome [MIM: 153480]; Cowden syndrome 1 [MIM: 158350]; macrocephaly/autism syndrome [MIM: 605309] | OR:109, OR:201, OR:210548, OR:2969, OR:65285 | PTEN   |  | p.Ser287*         |  |
| TCS135 | HP:0001288, HP:0003560, HP:0003198, HP:0009830, HP:0002086, HP:0003324                                                                                                 | autosomal dominant Charcot-Marie-Tooth disease type 2 [MIM: 601472]; distal hereditary motor neuropathy type V [MIM: 600794]                                                            | OR:139536, OR:99938                          | GARS   |  | p.Glu333Val       |  |
| TCS136 | HP:0003473, HP:0000954, HP:0000598, HP:0030148, HP:0000126, HP:0001252, HP:0000579                                                                                     | autosomal dominant Say-Barber-Biesecker-Young-Simpson Syndrome (SBBYSS) [MIM: 603736]                                                                                                   | OR:3047                                      | KAT6B  |  | p.Gln1321Argfs*20 |  |
| TCS137 | HP:0000717, HP:0001999, HP:0000286, HP:0000218, HP:0001328, HP:0001166, HP:0000275, HP:0008050, HP:0002650, HP:0000098, HP:0001238, HP:0000446, HP:0000820, HP:0001780 | autism type 18 [MIM: 615032]                                                                                                                                                            |                                              | CHD8   |  | p.Arg773*         |  |
| TCS138 | HP:0001263, HP:0001999, HP:0001276, HP:0000347, HP:0001257, HP:0001182                                                                                                 | intellectual disability type 7 [MIM: 614104]                                                                                                                                            | OR:178469                                    | DYRK1A |  | p.Lys188Ile       |  |
| TCS139 | HP:0001251, HP:0012443, HP:0001321, HP:0002019, HP:0001263, HP:0001310, HP:0000486, HP:0001320                                                                         | Spinocerebellar ataxia 15 [MIM: 606658]; Spinocerebellar ataxia 29, congenital nonprogressive [MIM: 117360]                                                                             | OR:208513, OR:98769                          | ITPR1  |  | p.Ser277Ile       |  |
| TCS140 | HP:0001347, HP:0001268, HP:0001276, HP:0001347, HP:0001276, HP:0001257, HP:0000572                                                                                     | autosomal dominant early onset dementia with or without spastic paraparesis [MIM: 607822]                                                                                               | OR:1020                                      | PSEN1  |  | p.Leu381Val       |  |

## Test Cases

|        |                                                                                                                        |                                                                                                                                                                                                                                                                                                                                                                 |                                                                       |         |  |                  |  |
|--------|------------------------------------------------------------------------------------------------------------------------|-----------------------------------------------------------------------------------------------------------------------------------------------------------------------------------------------------------------------------------------------------------------------------------------------------------------------------------------------------------------|-----------------------------------------------------------------------|---------|--|------------------|--|
| TCS141 | HP:0004322, HP:0011328, HP:0001999, HP:0000964, HP:0001627, HP:0001252, HP:0001270, HP:0002652, HP:0000750             | Noonan syndrome-like disorder with loose anagen hair [MIM: 607721]                                                                                                                                                                                                                                                                                              | OR:2701                                                               | SHOC2   |  | p.Ser2Gly        |  |
| TCS142 | HP:0002019, HP:0100704, HP:0001263, HP:0001999, HP:0001510, HP:0001627, HP:0000047, HP:0001252, HP:0001649, HP:0000505 | Mowat-Wilson syndrome [MIM: 235730]                                                                                                                                                                                                                                                                                                                             | OR:2152                                                               | ZEB2    |  | p.Leu727Tyrfs*7  |  |
| TCS143 | HP:0000717, HP:0001263, HP:0001508, HP:0008551, HP:0001250, HP:0000407, HP:0002179                                     | Bosch-Boonstra-Schaaf optic atrophy syndrome [MIM: 615722]                                                                                                                                                                                                                                                                                                      | OR:401777                                                             | NR2F1   |  | p.Cys128Arg      |  |
| TCS144 | HP:0100021, HP:0001263, HP:0001252, HP:0002650, HP:0001250                                                             | generalized epilepsy; paroxysmal dyskinesia [MIM: 609446]                                                                                                                                                                                                                                                                                                       | OR:79137                                                              | KCNMA1  |  | p.Thr352Ala      |  |
| TCS145 | HP:0002020, HP:0000717, HP:0001263, HP:0004789                                                                         | autosomal dominant intellectual disability type 5 [MIM: 612621]                                                                                                                                                                                                                                                                                                 | OR:178469                                                             | SYNGAP1 |  | p.Arg299Profs*48 |  |
| TCS146 | HP:0007018, HP:0001263, HP:0001252, HP:0000750, HP:0001328, HP:0002650                                                 | autosomal dominant intellectual disability type 6 [MIM: 613970]                                                                                                                                                                                                                                                                                                 | OR:178469                                                             | GRIN2B  |  | p.Arg682Cys      |  |
| TCS147 | HP:0002019, HP:0001263, HP:0000824, HP:0000126, HP:0001250, HP:0004322, HP:0000074                                     | Cortical dysplasia, complex, with other brain malformations 5 [MIM: 615763]                                                                                                                                                                                                                                                                                     |                                                                       | TUBB2A  |  | p.Gln291Pro      |  |
| TCS148 | HP:0100021, HP:0100704, HP:0001263, HP:0001250                                                                         | autosomal dominant early infantile epileptic encephalopathy [MIM: 61459]; autosomal dominant nocturnal frontal lobe epilepsy 5 [MIM: 615005]                                                                                                                                                                                                                    | OR:98784                                                              | KCNT1   |  | p.Arg464His      |  |
| TCS149 | HP:0009049, HP:0009830                                                                                                 | Charcot-Marie-Tooth disease, dominant intermediate D [MIM: 607791]; Charcot-Marie-Tooth disease, type 1B [MIM: 118200]; Charcot-Marie-Tooth disease, type 2I [MIM: 607677]; Charcot-Marie-Tooth disease, type 2J [MIM: 607736]; Dejerine-Sottas disease [MIM: 145900]; Neuropathy, congenital hypomyelinating [MIM: 605253]; Roussy-Levy syndrome [MIM: 180800] | OR:100046, OR:101082, OR:3115, OR:64748, OR:99942, OR:99943, OR:99951 | MPZ     |  | p.Gly167Arg      |  |

## Test Cases

|        |                                                                                                                                    |                                                                                                                            |                                 |         |  |                  |  |
|--------|------------------------------------------------------------------------------------------------------------------------------------|----------------------------------------------------------------------------------------------------------------------------|---------------------------------|---------|--|------------------|--|
| TCS150 | HP:0003269, HP:0000483, HP:0001251, HP:0003429, HP:0006789, HP:0000545, HP:0000639, HP:0002352                                     | autosomal dominant spastic paraplegia 13 [MIM: 605280]; autosomal recessive hypomyelinating leukodystrophy 4 [MIM: 612233] | OR:100994, OR:280270, OR:280288 | HSPD1   |  | p.Ala536Val      |  |
| TCS151 | HP:0003234, HP:0100814, HP:0001999, HP:0001298, HP:0001252, HP:0001480, HP:0000767, HP:0001250, HP:0002079                         | autosomal dominant early infantile epileptic encephalopathy-7 [MIM: 613720]                                                | OR:439218                       | KCNQ2   |  | p.Gly281Trp      |  |
| TCS152 | HP:0007018, HP:0000717, HP:0001263, HP:0000709                                                                                     | autosomal dominant nonprogressive cerebellar ataxia with intellectual disability [MIM: 614756]                             | OR:314647                       | CAMTA1  |  | p.Tyr1077Cys     |  |
| TCS153 | HP:0001263, HP:0011157, HP:0012469, HP:0012650, HP:0001250                                                                         | Cortical dysplasia, complex, with other brain malformations 5 [MIM: 615763]                                                |                                 | TUBB2A  |  | p.Ile345Phe      |  |
| TCS154 | HP:0010296, HP:0001251, HP:0001272, HP:0001263, HP:0001999, HP:0000577, HP:0000618, HP:0001250, HP:0001257, HP:0000486             | autosomal dominant dystonia 12 [MIM: 128235]; autosomal dominant alternating hemiplegia of childhood 2 [MIM: 614820]       | OR:2131, OR:71517               | ATP1A3  |  | p.Gly325Asp      |  |
| TCS155 | HP:0000717, HP:0001263, HP:0000819, HP:0001427, HP:0003560                                                                         | autosomal dominant susceptibility to autism type 18 [MIM: 615032]                                                          |                                 | CHD8    |  | p.Arg582*        |  |
| TCS156 | HP:0001007, HP:0001263, HP:0001999, HP:0002020, HP:0011471, HP:0000998, HP:0001252, HP:0000473                                     | autosomal dominant Wiedemann-Steiner syndrome [MIM: 605130]                                                                | OR:319182                       | KMT2A   |  | p.Lys1218Glufs*4 |  |
| TCS157 | HP:0001263, HP:0001999, HP:0000508, HP:0004322, HP:0000750                                                                         | autosomal dominant Floating-Harbor syndrome [MIM: 136140]                                                                  | OR:2044                         | SRCAP   |  | p.Arg2435*       |  |
| TCS158 | HP:0001640, HP:0001627, HP:0002019, HP:0001263, HP:0001999, HP:0000545, HP:0000767, HP:0000508, HP:0001250, HP:0004322, HP:0002138 | autosomal dominant Noonan syndrome 1 [MIM: 163950]                                                                         | OR:648                          | PTPN11  |  | p.Asn308Asp      |  |
| TCS159 | HP:0001263, HP:0001999, HP:0002415, HP:0001250, HP:0000026, HP:0002500                                                             | autosomal dominant Nicolaides-Baraitser syndrome [MIM: 601358]                                                             | OR:3051                         | SMARCA2 |  | p.His1161Arg     |  |
| TCS160 | HP:0001627, HP:0001680, HP:0001263, HP:0012572, HP:0002020, HP:0001627, HP:0001252, HP:0000388, HP:0004755                         | autosomal dominant Kabuki syndrome [MIM: 147920]                                                                           | OR:2322                         | KMT2D   |  | p.Gln3759*       |  |

## Test Cases

|        |                                                                                                                                                            |                                                                                                                                                                                                       |                                     |         |  |                  |  |
|--------|------------------------------------------------------------------------------------------------------------------------------------------------------------|-------------------------------------------------------------------------------------------------------------------------------------------------------------------------------------------------------|-------------------------------------|---------|--|------------------|--|
| TCS161 | HP:0000483, HP:0001263, HP:0000565, HP:0001276, HP:0001252, HP:0002415, HP:0000545, HP:0000648, HP:0001290, HP:0002500                                     | autosomal dominant Pitt-Hopkins syndrome [MIM: 610954]                                                                                                                                                | OR:2896                             | TCF4    |  | p.Gly656Argfs*55 |  |
| TCS162 | HP:0001263, HP:0001999, HP:0000347, HP:0000639                                                                                                             | autosomal dominant Nicolaides-Baraitser Syndrome [MIM: 601358]                                                                                                                                        | OR:3051                             | SMARCA2 |  | p.Asp534Tyr      |  |
| TCS163 | HP:0001263, HP:0001999, HP:0001252, HP:0000023, HP:0002058, HP:0002928, HP:0011069, HP:0000028                                                             | autosomal dominant Glass Syndrome [MIM: 612313]                                                                                                                                                       | OR:251019                           | SATB2   |  | p.Thr390Ile      |  |
| TCS164 | HP:0001251, HP:0003560, HP:0003198                                                                                                                         | autosomal dominant limb-girdle muscular dystrophy [MIM: 159001], autosomal dominant congenital muscular dystrophy [MIM: 613205]; autosomal dominant Emery-Dreifuss muscular dystrophy 2 [MIM: 181350] | OR:157973, OR:261, OR:264, OR:98853 | LMNA    |  | Splice defect    |  |
| TCS165 | HP:0100021, HP:0001263, HP:0001999, HP:0001288, HP:0002650                                                                                                 | autosomal dominant intellectual disability 19 [MIM: 615075]                                                                                                                                           | OR:404473                           | CTNNB1  |  | p.Leu424Arg      |  |
| TCS166 | HP:0000483, HP:0011995, HP:0001631, HP:0001647, HP:0002019, HP:0004484, HP:0000365, HP:0001263, HP:0001999, HP:0002020, HP:0000365, HP:0001601, HP:0001655 | autosomal dominant CHARGE syndrome [MIM: 214800]                                                                                                                                                      |                                     | CHD7    |  | p.His1734Serfs*3 |  |
| TCS167 | HP:0002126, HP:0000365, HP:0001263, HP:0011157, HP:0000365, HP:0001252, HP:0000639, HP:0006879, HP:0001250                                                 | X-linked dominant intellectual disability; microcephaly with pontine; cerebellar hypoplasia (MICPCH) [MIM: 300749]                                                                                    | OR:163937                           | CASK    |  | Splice defect    |  |
| TCS168 | HP:0000175, HP:0004484, HP:0001263, HP:0001999, HP:0000842, HP:0000316, HP:0001943, HP:0001252, HP:0001511, HP:0000347, HP:0000278                         | autosomal dominant Birk-Barel intellectual disability dysmorphism syndrome [MIM: 612292]                                                                                                              | OR:166108                           | KCNK9   |  | p.Gly236Arg      |  |



## Test Cases

|        |                                                                                                                                                                                                                                                                           |                                                                  |                                        |          |  |                   |  |
|--------|---------------------------------------------------------------------------------------------------------------------------------------------------------------------------------------------------------------------------------------------------------------------------|------------------------------------------------------------------|----------------------------------------|----------|--|-------------------|--|
| TCS169 | HP:0001500, HP:0004484, HP:0001263, HP:0001999, HP:0000286, HP:0000286, HP:0011157, HP:0000218, HP:0003186, HP:0001388, HP:0002808, HP:0002003, HP:0000276 and HP:0000275, HP:0000368, HP:0000272, HP:0000767, HP:0000275, HP:0000767, HP:0002650, HP:0001250, HP:0001781 | Sotos syndrome [MIM:117550]                                      | OR:821                                 | NSD1     |  | p.Glu1184*        |  |
| TCS170 | HP:0012443, HP:0001263, HP:0001347, HP:0001257, HP:0002136                                                                                                                                                                                                                | autosomal dominant lissencephaly 3 [MIM: 611603]                 | OR:171680                              | TUBA1A   |  | p.Val118Met       |  |
| TCS171 | HP:0001263, HP:0001252, HP:0000508, HP:0004322                                                                                                                                                                                                                            | autosomal dominant Wiedemann-Steiner syndrome [MIM: 605130]      | OR:319182                              | KMT2A    |  | p.Ser3446Phefs*29 |  |
| TCS172 | HP:0001508, HP:0001252, HP:0003128                                                                                                                                                                                                                                        | Leigh syndrome, due to COX deficiency [MIM: 256000]              | OR:255210, OR:255241, OR:506, OR:70474 | SURF1    |  | Splice Defect     |  |
| TCS173 | HP:0001397, HP:0004420, HP:0003128, HP:0001942, HP:0012103, HP:0002928, HP:0002878, HP:0001714, HP:0002500                                                                                                                                                                | Leigh syndrome [MIM:256000]                                      | OR:255210, OR:255241, OR:506, OR:70474 | NDUFS8   |  | p.Lys115Glu       |  |
| TCS174 | HP:0007401, HP:0000551, HP:0000510, HP:0000510, HP:0007875, HP:0007401, HP:0000662, HP:0000639, HP:0000613                                                                                                                                                                | Leber congenital amaurosis [MIM: 614186]                         | OR:65                                  | KCNJ13   |  | p.Thr153Ile       |  |
| TCS175 | HP:0012444, HP:0003688, HP:0001263, HP:0012572, HP:0001508, HP:0011968, HP:0011968, HP:0001510, HP:0040083                                                                                                                                                                | leukocyte adhesion deficiency II (LAD2) [MIM: 266265]            | OR:2968, OR:99843                      | SLC35C1  |  | p.Thr291Ile       |  |
| TCS176 | HP:0000717, HP:0100543, HP:0001263, HP:0001263, HP:0001252, HP:0004305, HP:0001250, HP:0100716, HP:0002360                                                                                                                                                                | autosomal recessive cutis laxa, type IIIA (ARCL3A) [MIM: 219150] | OR:2962, OR:35664                      | ALDH18A1 |  | p.Arg765Gln       |  |
| TCS177 | HP:0001999, HP:0001508, HP:0001252, HP:0000347, HP:0011220, HP:0002878, HP:0001250                                                                                                                                                                                        | autosomal recessive non-ketotic hyperglycinemia [MIM: 605899]    | OR:407                                 | GLDC     |  | p.Pro581Arg       |  |
| TCS178 | HP:0000365, HP:0000365                                                                                                                                                                                                                                                    | autosomal recessive Usher Syndrome type 2A [MIM: 276901]         | OR:231178, OR:886                      | USH2A    |  | p.Ser3276*        |  |
| TCS179 | HP:0001263, HP:0000238, HP:0001250                                                                                                                                                                                                                                        | pyridoxine-dependent epilepsy [MIM: 266100]                      | OR:3006                                | ALDH7A1  |  | p.Glu427Gln       |  |

## Test Cases

|        |                                                                                                                                                                                    |                                                                                                                                                                                                                                                                                                                                          |                                                              |        |  |                       |  |
|--------|------------------------------------------------------------------------------------------------------------------------------------------------------------------------------------|------------------------------------------------------------------------------------------------------------------------------------------------------------------------------------------------------------------------------------------------------------------------------------------------------------------------------------------|--------------------------------------------------------------|--------|--|-----------------------|--|
| TCS180 | HP:0001324, HP:0003560, HP:0003198                                                                                                                                                 | autosomal recessive Limb-girdle muscular dystrophy type 2G [MIM: 601954]                                                                                                                                                                                                                                                                 | OR:34514                                                     | TCAP   |  | p.Ser11*              |  |
| TCS181 | HP:0012179, HP:0030038, HP:0000365, HP:0001250                                                                                                                                     | Bart-Pumphrey syndrome [MIM: 149200]; Deafness, autosomal dominant 3A [MIM: 601544]; Deafness, autosomal recessive 1A [MIM: 220290]; Hystrix-like ichthyosis with deafness [MIM: 602540]; Keratitis-ichthyosis-deafness syndrome [MIM: 148210]; Keratoderma, palmoplantar, with deafness [MIM: 148350]; Vohwinkel syndrome [MIM: 124500] | OR:2202, OR:2698, OR:477, OR:477, OR:494, OR:90635, OR:90636 | GJB2   |  | p.Val37Ile            |  |
| TCS182 | HP:0001263, HP:0001999, HP:0011968, HP:0000126, HP:0001276, HP:0000347                                                                                                             | autosomal recessive Crisponi syndrome (cold-induced sweating syndrome type 1) [MIM: 272430]                                                                                                                                                                                                                                              | OR:157820                                                    | CRLF1  |  | p.Pro239Alafs*91      |  |
| TCS183 | HP:0000483, HP:0001251, HP:0000009, HP:0012444, HP:0002363, HP:0100543, HP:0000551, HP:0002283, HP:0011096, HP:0001263, HP:0003469, HP:0000648, HP:0007256, HP:0002273, HP:0001257 | autosomal recessive adrenoleukodystrophy due to peroxisomal acyl-CoA oxidase deficiency [MIM: 264470]                                                                                                                                                                                                                                    | OR:2971                                                      | ACOX1  |  | p.Arg59Pro            |  |
| TCS184 | HP:0009049, HP:0005109, HP:0001284, HP:0100021, HP:0001371, HP:0011096, HP:0002380, HP:0001324, HP:0009830, HP:0002650, HP:0002179                                                 | autosomal recessive Charcot-Marie-Tooth Disease (CMT) type 4C [MIM: 601596]                                                                                                                                                                                                                                                              | OR:99949                                                     | SH3TC2 |  | p.Arg954*             |  |
| TCS185 | HP:0012178, HP:0001945, HP:0002721, HP:0001744                                                                                                                                     | autosomal recessive familial hemophagocytic lymphohistiocytosis type 2 [MIM: 603553]                                                                                                                                                                                                                                                     | OR:540                                                       | PRF1   |  | p.Gln446Pro           |  |
| TCS186 | HP:0001288, HP:0001347, HP:0007443, HP:0001427, HP:0001324, HP:0001257                                                                                                             | autosomal recessive spastic paraplegia type 35 (SPG35) [MIM: 612319]                                                                                                                                                                                                                                                                     | OR:171629                                                    | FA2H   |  | p.Pro173Ser           |  |
| TCS187 | HP:0001263, HP:0003128, HP:0001252, HP:0000816, HP:0012103, HP:0011968, HP:0002878, HP:0000488                                                                                     | autosomal recessive mitochondrial DNA depletion syndrome types 8A; 8B [MIM: 612075]                                                                                                                                                                                                                                                      | OR:254803, OR:255235, OR:298                                 | RRM2B  |  | p.Gly212_Leu213insSer |  |

## Test Cases

|        |                                                                                                                                                                        |                                                                                                                                                                                                     |                                                                                         |        |  |                   |  |
|--------|------------------------------------------------------------------------------------------------------------------------------------------------------------------------|-----------------------------------------------------------------------------------------------------------------------------------------------------------------------------------------------------|-----------------------------------------------------------------------------------------|--------|--|-------------------|--|
| TCS188 | HP:0002586, HP:0001903, HP:0004348, HP:0100546, HP:0001263, HP:0001999, HP:0003774, HP:0001508, HP:0001627, HP:0000822, HP:0001642, HP:0001250, HP:0001297, HP:0000076 | autosomal recessive combined oxidative phosphorylation deficiency type 15 [MIM: 611766]                                                                                                             |                                                                                         | MTFMT  |  | p.Pro373Glnfs*19  |  |
| TCS189 | HP:0001903, HP:0002908, HP:0002904, HP:0003128, HP:0001399, HP:0012103, HP:0001873, HP:0002910                                                                         | autosomal recessive transient infantile liver failure [MIM: 613070]                                                                                                                                 | OR:217371                                                                               | TRMU   |  | p.Leu253Pro       |  |
| TCS190 | HP:0001251, HP:0000717, HP:0100021, HP:0001263, HP:0002376, HP:0001298, HP:0001252, HP:0001257                                                                         | autosomal recessive infantile neuroaxonal dystrophy 1 (neurodegeneration with brain iron accumulation types 2A; 2B) [MIM: 256600] [MIM: 610217]                                                     | OR:35069, OR:35069                                                                      | PLA2G6 |  | p.Gly373Arg       |  |
| TCS191 | HP:0000646, HP:0000483, HP:0001363, HP:0001263, HP:0001999, HP:0000621, HP:0011157, HP:0001252, HP:0000545, HP:0000639, HP:0000508, HP:0001250, HP:0000026             | Alpha-thalassemia myelodysplasia syndrome, somatic [MIM: 300448]; Alpha-thalassemia/mental retardation syndrome [MIM: 301040]; Mental retardation-hypotonic facies syndrome, X-linked [MIM: 309580] | OR:231401, OR:73220, OR:847, OR:93970, OR:93971, OR:93972, OR:93973, OR:93974, OR:93975 | ATRX   |  | p.Pro190Ala       |  |
| TCS192 |                                                                                                                                                                        | X-linked cone-rod dystrophy [MIM: 304020]                                                                                                                                                           | OR:1872                                                                                 | RPGR   |  | p.Glu1060ArgfsX18 |  |
| TCS193 | HP:0002027, HP:0000463, HP:0001263, HP:0001999, HP:0001508, HP:0001945, HP:0001276, HP:0009058, HP:0000527, HP:0030434, HP:0000520, HP:0001250, HP:0003196             | Kabuki Syndrome [MIM: 300867]                                                                                                                                                                       | OR:2322                                                                                 | KDM6A  |  | p.Arg1279*        |  |
| TCS194 | HP:0000717, HP:0004484, HP:0001999, HP:0000286, HP:0002463, HP:0011800                                                                                                 | X-Linked Intellectual Disability Syndromes: Lujan-Fryns Syndrome [MIM:309520]; Opitz-Kaveggia Syndrome [MIM: 305450]                                                                                | OR:776                                                                                  | MED12  |  | p.Thr617Ala       |  |
| TCS195 | HP:0004430, HP:0002955, HP:0002721, HP:0000999, HP:0000988, HP:0200043                                                                                                 | X-linked recessive severe combined immunodeficiency [MIM: 300400]                                                                                                                                   | OR:276                                                                                  | IL2RG  |  | p.Val152Ala       |  |
| TCS196 | HP:0003113, HP:0002900, HP:0002902, HP:0001254                                                                                                                         | autosomal recessive Bartter Syndrome type 3 [MIM: 607364]                                                                                                                                           | OR:112, OR:93605                                                                        | CLCNKB |  | p.Leu633*         |  |

## Test Cases

|        |                                                                                                                        |                                                                                                                                                                                                               |                                                                      |          |  |                                  |  |
|--------|------------------------------------------------------------------------------------------------------------------------|---------------------------------------------------------------------------------------------------------------------------------------------------------------------------------------------------------------|----------------------------------------------------------------------|----------|--|----------------------------------|--|
| TCS197 | HP:0001671, HP:0100021, HP:0001263, HP:0001999, HP:0001508, HP:0001627, HP:0001252, HP:0001684                         | X-linked recessive intellectual disability with hypotonic facies syndrome [MIM: 309580]                                                                                                                       | OR:73220, OR:93970, OR:93971, OR:93972, OR:93973, OR:93974, OR:93975 | ATRX     |  | p.Arg2131Gln                     |  |
| TCS198 | HP:0000717, HP:0001263, HP:0001999, HP:0001252                                                                         | X-linked intellectual disability type 93 [MIM: 300659]                                                                                                                                                        |                                                                      | BRWD3    |  | p.Leu1419Val                     |  |
| TCS199 | HP:0007663, HP:0007994, HP:0000510, HP:0000510, HP:0000572                                                             | glucose-6-phosphate deficiency in males [MIM: 305900]                                                                                                                                                         |                                                                      | G6PD     |  | p.Ser188Phe                      |  |
| TCS200 | HP:0001284, HP:0001371, HP:0005684, HP:0001252, HP:0001511, HP:0001511, HP:0003198, HP:0200136, HP:0002098             | autosomal recessive congenital myasthenic syndrome associated with facial dysmorphism; acetylcholine receptor deficiency [MIM: 608931]; autosomal recessive fetal akinesia deformation sequence [MIM: 200150] | OR:590, OR:98913, OR:994                                             | RAPSN    |  | p.Gln175Arg, p.Thr277Ala         |  |
| TCS201 | HP:0009806, HP:0001510, HP:0003072, HP:0000843, HP:0002900, HP:0002902, HP:0012408, HP:0000103, HP:0004322             | autosomal recessive Bartter syndrome, antenatal, type 1 [MIM: 601678]                                                                                                                                         | OR:112, OR:93604                                                     | SLC12A1  |  | p.Ala508Thr, p.Tyr245*           |  |
| TCS202 | HP:0000717, HP:0000803, HP:0001263, HP:0001252, HP:0003560, HP:0002126                                                 | autosomal recessive congenital muscular dystrophy-dystroglycanopathy with brain; eye anomalies type A, 11 [MIM: 615181]                                                                                       | OR:588, OR:899                                                       | B3GALNT2 |  | p.Asp327Asn, p.Glu480_Trp485 dup |  |
| TCS203 | HP:0003150, HP:0001263, HP:0011157, HP:0002079, HP:0001250, HP:0001257                                                 | familial or infantile myoclonic epilepsy [MIM: 613577]                                                                                                                                                        |                                                                      | TBC1D24  |  | p.Cys424Arg, p.Trp406Cys         |  |
| TCS204 | HP:0007018, HP:0007018, HP:0000708, HP:0000510, HP:0000752, HP:0007018, HP:0000510, HP:0001250, HP:0000572             | neuronal ceroid lipofuscinosis (NCL) [MIM:600143]                                                                                                                                                             | OR:168491, OR:228354, OR:79264                                       | CLN8     |  | p.Ala71Val, p.Leu188Valfs        |  |
| TCS205 | HP:0011504, HP:0001133, HP:0000510                                                                                     | autosomal recessive juvenile onset macular dystrophy (Stargardt Disease) [MIM: 248200]                                                                                                                        | OR:827                                                               | CNGB3    |  | p.Arg403Gln, p.Tyr398Cys         |  |
| TCS206 | HP:0001251, HP:0000365, HP:0006292, HP:0000968, HP:0000365, HP:0000376, HP:0000695, HP:0004322, HP:0006288, HP:0004324 | autosomal recessive hypomyelinating leukodystrophy type 8 [MIM:614381]                                                                                                                                        | OR:88637                                                             | POLR3B   |  | p.Thr663Ile, p.Val523Glu         |  |

## Test Cases

|        |                                                                                                                                                                                    |                                                                                                                               |                      |                  |  |                              |  |
|--------|------------------------------------------------------------------------------------------------------------------------------------------------------------------------------------|-------------------------------------------------------------------------------------------------------------------------------|----------------------|------------------|--|------------------------------|--|
| TCS207 | HP:0011504, HP:0000551, HP:0030514, HP:0000662, HP:0001133, HP:0000510                                                                                                             | autosomal recessive retinitis pigmentosa type 26 (RP26) [MIM: 608380]                                                         | OR:791               | CERKL            |  | p.Arg257*, p.Asp225Val       |  |
| TCS208 | HP:0002650, HP:0002910, HP:0000961, HP:0001263, HP:0000363, HP:0002213, HP:0001252, HP:0012429, HP:0003560, HP:0000028, HP:0001583, HP:0002079                                     | autosomal recessive progressive myoclonic epilepsy, type 6 [MIM: 614018]                                                      | OR:280620            | GOSR2            |  | Splice defect, p.Gly144Trp   |  |
| TCS209 | HP:0002870, HP:0001385, HP:0001272, HP:0001321, HP:0002472, HP:0001263, HP:0000565, HP:0001385, HP:0001252, HP:0001427, HP:0003198, HP:0001321, HP:0025267, HP:0002515, HP:0002500 | GM1-Gangliosidosis type 1 [MIM:230500]                                                                                        | OR:354, OR:79255     | GLB1             |  | p.Gly123Arg, p.Thr82Met      |  |
| TCS210 | HP:0000565, HP:0012072, HP:0002321, HP:0001508, HP:0002315, HP:0010908, HP:0002076, HP:0002018, HP:0000246, HP:0001643, HP:0030148, HP:0004365                                     | autosomal recessive 2-aminoadipic 2-oxoadipic aciduria [MIM:204750]                                                           | OR:79154             | DHTKD1           |  | p.Arg715Cys, p.Gly729Arg     |  |
| TCS211 | HP:0001297, HP:0002381, HP:0001298, HP:0000738, HP:0001427, HP:0002180, HP:0001337, HP:0003324                                                                                     | autosomal recessive familial Mediterranean fever [MIM: 249100]                                                                | OR:342               | MEFV             |  | p.Ala744Ser, p.Lys695Arg     |  |
| TCS212 | HP:0012115, HP:0001399                                                                                                                                                             | autosomal recessive Niemann-Pick disease type C1 (NPC1) [MIM: 257220]                                                         | OR:646               | NPC1             |  | p.Pro1080IlefsX18, p.Ser738* |  |
| TCS213 | HP:0001251, HP:0009830                                                                                                                                                             | Amyotrophic lateral sclerosis 4, juvenile [MIM: 602433]; Ataxia-ocular apraxia-2 [MIM: 606002]                                | OR:357043, OR:64753  | SETX             |  | Splice defect, p.Gly2036Arg  |  |
| TCS214 | HP:0001709, HP:0001320, HP:0001263, HP:0012722, HP:0000545, HP:0001107, HP:0001010, HP:0001539, HP:0000609, HP:0011683                                                             | oculocutaneous albinism type IV [MIM: 606574]                                                                                 | OR:79435             | SLC45A2, SLC45A2 |  | p.Gly89Aspfs*24, p.Leu485Pro |  |
| TCS215 | HP:0001263, HP:0002013, HP:0001298, HP:0003128, HP:0001942                                                                                                                         | autosomal recessive acyl-CoA dehydrogenase-9 deficiency [MIM: 611126]                                                         | OR:99901             | ACAD9, ACAD9     |  | p.Phe120Serfs*9, p.Pro616Ser |  |
| TCS216 | HP:0006918, HP:0006789, HP:0001251, HP:0003128, HP:0001250, HP:0000988, HP:0001297, HP:0002401                                                                                     | autosomal recessive recurrent infections with encephalopathy, hepatic dysfunction; cardiovascular malformations [MIM: 613759] | OR:306550, OR:306550 | FADD             |  | p.Cys105Arg, p.Ser18*        |  |

## Test Cases

|        |                                                                                                |                                                                                                                                                                                                 |                                                     |        |  |                                 |  |
|--------|------------------------------------------------------------------------------------------------|-------------------------------------------------------------------------------------------------------------------------------------------------------------------------------------------------|-----------------------------------------------------|--------|--|---------------------------------|--|
| TCS217 | HP:0012378, HP:0001324, HP:0003560, HP:0003198, HP:0012531, HP:0003201                         | autosomal recessive early-onset myopathy [MIM: 611705]; limb-girdle muscular dystrophy type 2J [MIM: 608677]                                                                                    | OR:140922, OR:289377                                | TTN    |  | p.Arg32684Thrfs*47, p.Arg33084* |  |
| TCS218 | HP:0003128, HP:0001942, HP:0001427, HP:0002098                                                 | autosomal recessive lipoylation defect of the 2-ketoacid dehydrogenase complexes [MIM: 608677]                                                                                                  |                                                     | LIPT1  |  | p.Leu327*, p.Trp269*            |  |
| TCS219 | HP:0002308, HP:0002020, HP:0000670, HP:0001263, HP:0001276, HP:0001250, HP:0001257             | autosomal recessive complexed Joubert[?]s syndrome type 3 [MIM: 608629]                                                                                                                         | OR:220493                                           | AHI1   |  | p.Cys854Phe, p.Ser1123Phe       |  |
| TCS220 | HP:0000083, HP:0001394, HP:0001394, HP:0001508, HP:0001399, HP:0012120                         | autosomal recessive methylmalonic aciduria [MIM: 251000]                                                                                                                                        | OR:27, OR:289916, OR:79312                          | MUT    |  | p.Ala631Glnfs*17, p.Arg108Cys   |  |
| TCS221 | HP:0001638                                                                                     | autosomal recessive combined oxidative phosphorylation deficiency type 3 (COPD3) [MIM: 61050]                                                                                                   |                                                     | TSFM   |  | p.Arg333Trp, p.Val119Leu        |  |
| TCS222 | HP:0001263, HP:0001999, HP:0001252, HP:0003202, HP:0003560                                     | autosomal recessive merosin-deficient muscular dystrophy [MIM: 607855]                                                                                                                          | OR:258                                              | LAMA2  |  | p.Arg683Serfs*21, p.Glu175*     |  |
| TCS223 | HP:0002910, HP:0011157, HP:0001943, HP:0003128, HP:0001399, HP:0001324, HP:0003201, HP:0001250 | autosomal recessive glutaric acidemia IIC [MIM: 231680]                                                                                                                                         | OR:26791                                            | ETFDH  |  | p.Leu496Pro, p.Pro456Leu        |  |
| TCS224 | HP:0000726, HP:0002415, HP:0001300, HP:0001337                                                 | autosomal recessive hypomyelinating leukodystrophy-7 [MIM: 607694]                                                                                                                              | OR:137639, OR:447893, OR:447896, OR:77295, OR:88637 | POLR3A |  | p.Lys123del, p.Met852Val        |  |
| TCS225 | HP:0009049, HP:0001251, HP:0009830                                                             | autosomal dominant myofibrillar myopathy type 4 [MIM: 609452]; autosomal dominant dilated cardiomyopathy type 1C with or without noncompaction of the left ventricular myocardium [MIM: 601493] | OR:154, OR:54260, OR:98912                          | LDB3   |  | p.Arg268Cys                     |  |
| TCS226 | HP:0002647                                                                                     | autosomal dominant Ehlers-Danlos syndrome type IV [MIM: 130050]; autosomal dominant Ehlers-Danlos syndrome type III [MIM: 130020]                                                               | OR:285, OR:286                                      | COL3A1 |  | p.Gln1366*                      |  |

## Test Cases

|        |                                                                                                                                    |                                                                                                                                                                                    |                                                         |               |  |                                                        |  |
|--------|------------------------------------------------------------------------------------------------------------------------------------|------------------------------------------------------------------------------------------------------------------------------------------------------------------------------------|---------------------------------------------------------|---------------|--|--------------------------------------------------------|--|
| TCS227 | HP:0011516, HP:0000551, HP:0000510, HP:0000551, HP:0030532                                                                         | autosomal dominant optic atrophy type 1 (OPA1) [MIM: 165500]                                                                                                                       | OR:98673                                                | OPA1          |  | p.Arg711*                                              |  |
| TCS228 | HP:0001640, HP:0001638, HP:0002566                                                                                                 | dilated cardiomyopathy type 1FF [MIM: 613286]; type 2A [MIM: 611880]; familial hypertrophic cardiomyopathy type 7 [MIM: 613690]; familial restrictive cardiomyopathy [MIM: 115210] | OR:154, OR:154, OR:75249                                | TNNI3         |  | p.Arg170Gly                                            |  |
| TCS229 | HP:0002748, HP:0002757, HP:0000938, HP:0002652, HP:0100512                                                                         | autosomal dominant osteogenesis imperfecta type II [MIM:166210], type III [MIM: 259420]; type IV [MIM: 166220]                                                                     | OR:216804, OR:216812, OR:216820, OR:666, OR:666, OR:666 | COL1A2        |  | p.Pro986Leu                                            |  |
| TCS230 | HP:0002750, HP:0001510, HP:0001878, HP:0001971, HP:0002721, HP:0001744                                                             | chronic non-spherocytic hemolytic anemia (CNSHA) [MIM: 305900]                                                                                                                     |                                                         | G6PD, STAT1   |  | p.Arg274Trp, p.Ser188Phe                               |  |
| TCS231 | HP:0001263, HP:0001999, HP:0011157, HP:0000365, HP:0001302, HP:0001250                                                             | autosomal recessive auditory neuropathy; deafness [MIM:601071]                                                                                                                     | OR:178469, OR:284232, OR:90636, OR:98878                | DYNC1H1, OTOF |  | p.Arg1567Leu, p.Glu1057Lys, p.Glu1700Gln, p.Lys1310dup |  |
| TCS232 | HP:0004313, HP:0002721, HP:0001891                                                                                                 | common variable immunodeficiency type 2 [MIM: 240500]                                                                                                                              | OR:1572, OR:98879                                       | TNFRSF13B     |  | p.Ala279Thr, p.Cys104Arg                               |  |
| TCS233 | HP:0011516, HP:0000551, HP:0000510, HP:0000639, HP:0001133, HP:0000613                                                             | achromatopsia; cone dystrophy type 4 (COD4) [MIM: 613093]                                                                                                                          | OR:1871, OR:49382                                       | PDE6C         |  | p.Leu653Pro                                            |  |
| TCS234 | HP:0003131, HP:0000097, HP:0000093, HP:0000556, HP:0003131, HP:0000110                                                             | autosomal recessive Bothnia retinal dystrophy [MIM: 607475]; autosomal recessive Retinitis punctata albescens [MIM: 136880]                                                        | OR:227796, OR:52427, OR:85128                           | RLBP1         |  | p.Phe96_Phe99del                                       |  |
| TCS235 | HP:0000510, HP:0000488                                                                                                             | autosomal recessive retinitis pigmentosa type 38 [MIM: 613862]                                                                                                                     | OR:791                                                  | MERTK         |  | p.Leu731Ser                                            |  |
| TCS236 | HP:0002721, HP:0005352                                                                                                             | autosomal recessive dyskeratosis congenita type 5 [MIM:615190]                                                                                                                     | OR:1775, OR:3322                                        | RTEL1         |  | p.Arg1010*, p.Ile449Thr                                |  |
| TCS237 | HP:0005110, HP:0002253, HP:0001997, HP:0000822, HP:0003233, HP:0000135, HP:0000821, HP:0001513, HP:0000510, HP:0010535, HP:0100512 | autosomal recessive Retinitis Pigmentosa 49 (RP49) [MIM: 613756]                                                                                                                   | OR:791                                                  | CNGA1         |  | p.Arg218*, p.Ser320Phe                                 |  |
| TCS238 | HP:0001067                                                                                                                         | autosomal dominant neurofibromatosis type 1 (NF1) [MIM: 162200]                                                                                                                    | OR:363700, OR:636                                       | NF1           |  | p.Arg2616*                                             |  |

## Test Cases

|        |                                                                                                                        |                                                                                                                    |                                                    |        |  |                 |  |
|--------|------------------------------------------------------------------------------------------------------------------------|--------------------------------------------------------------------------------------------------------------------|----------------------------------------------------|--------|--|-----------------|--|
| TCS239 | HP:0001999, HP:0000316, HP:0002885, HP:0008551                                                                         | autosomal dominant desmoplastic medulloblastoma [MIM: 155255]; susceptibility to familial meningioma [MIM: 607174] | OR:251858, OR:251863, OR:251867, OR:263662, OR:616 | SUFU   |  | p.Tyr38Thrfs*58 |  |
| TCS240 | HP:0005616, HP:0000646, HP:0001263, HP:0001999, HP:0011157, HP:0001250, HP:0004322, HP:0010049, HP:0003298, HP:0000076 | autosomal dominant pseudohypoparathyroidism types Ia (PHP Ia) [MIM: 103580]; Ic (PHP Ic) [MIM: 612462]             | OR:79443, OR:79444                                 | GNAS   |  | p.Gln294*       |  |
| TCS241 | HP:0001263, HP:0001999, HP:0001510, HP:0001382, HP:0002079                                                             | autosomal dominant SHORT syndrome [MIM: 269880]                                                                    | OR:3163                                            | PIK3R1 |  | p.Arg649Trp     |  |
| TCS242 | HP:0000062, HP:0001328                                                                                                 | autosomal dominant sex-limited 46,XY sex reversal 3 [MIM:612965]                                                   | OR:242, OR:251510                                  | NR5A1  |  | p.Glu51*        |  |
| TCS243 | HP:0000365, HP:0000365, HP:0007703, HP:0000662, HP:0007703, HP:0000510, HP:0007843                                     | autosomal dominant retinitis pigmentosa (type 37) [MIM: 611131]; enhanced S-cone syndrome [MIM: 268100]            | OR:53540, OR:791                                   | NR2E3  |  | p.Gly56Arg      |  |
| TCS244 | HP:0001631, HP:0000717, HP:0001263, HP:0001999, HP:0000577, HP:0000126, HP:0002904, HP:0000388, HP:0000488, HP:0001537 | autosomal dominant Sotos Syndrome [MIM: 117550]                                                                    | OR:821                                             | NSD1   |  | Splice defect   |  |
|        |                                                                                                                        |                                                                                                                    |                                                    |        |  |                 |  |



Abbreviations used in this Supplementary File

|      |                                  |
|------|----------------------------------|
| HPO  | Human Phenotype Ontology         |
| HGNC | HUGO Gene Nomenclature Committee |
| NM   | <i>RefSeq</i> Accession          |
| AD   | Autosomal Dominant               |
| AR   | Autosomal Recessive              |
